# Supplementary material for: The Dynamics of Diabetes Among Birth Cohorts in the U.S
Source: PubMed Central journal article supplement — Diabetes Care. 2014 Mar 8;37(4):1052–9. doi: 10.2337/dc13-1982 (PMC3964490; doi:10.2337/dc13-1982), 2014-03-08
Supplement: supp_dc13-1982v131982_DC131982SupplementaryData.pdf [file supp_dc13-1982v131982_DC131982SupplementaryData.pdf]

## Appendix 1: Cohort Obesity Prevalence

The prevalence of obesity at age 25 in successive cohorts, used in our age/period/cohort model as a continuous variable, is shown in the following table:

### Percent Obese at Age 25 in Successive Cohorts

| <u>Birth Years</u> | <u>Percent</u> |
|--------------------|----------------|
| 1920-1924          | 2.00%          |
| 1925-1929          | 2.58%          |
| 1930-1934          | 3.34%          |
| 1935-1939          | 3.46%          |
| 1940-1944          | 3.96%          |
| 1945-1949          | 4.85%          |
| 1950-1954          | 5.99%          |
| 1955-1959          | 6.99%          |
| 1960-1964          | 8.47%          |
| 1965-1969          | 11.32%         |
| 1970-1974          | 14.52%         |
| 1975-1979          | 15.92%         |

Sources: Calculated from NHANES continuous waves 1999-2008 using the interview sample.

One limitation of our study is that we used retrospective data on height and weight to estimate trends in cohort obesity at age 25 for subsequent US birth cohorts. Recall data may be subject to errors of misreporting. However, prior research using longitudinal data found a relatively high degree of correspondence between recall and contemporaneously reported data on BMI (A1). Validity of recall data over longer intervals of time has not been investigated. A second limitation is that we were not able to investigate cohort trends in obesity at younger ages because of lack of data on trends in childhood and adolescence.

## Appendix 2: Derivation of Formula for Estimating Incidence of Diabetes from Prevalence of Diabetes in a Cohort

Suppose that 20% of a cohort has diabetes at age 30 and 25% of that cohort has diabetes at age 35. Then the incidence of diabetes (number of new cases per diabetes-free member of the population) between ages 30 and 35 is approximately  $.05/.80=.0625$ . That figure refers to incidence over a five-year period, whereas incidence is normally measured annually. An annualized rate would be  $.0625/5=.0125$ . This figure is based on the number who are free of diabetes at the beginning of the interval, whereas incidence is typically measured using a denominator measured at the middle of the interval. So the corrected figure is  $(.05/.775)/5=.0129$ .

This calculation makes three basic assumptions: (1) Migration does not affect birth cohort prevalence; (2) Those with diabetes at age 30 do not become diabetes-free by age 35, and (3) Those with diabetes at age 30 have the same probability of dying by age 35 as those who were diabetes-free at age 30. In constructing our estimates of the incidence of diabetes, we retain assumption 1 and 2, that migration does not affect prevalence and that those who enter the diabetic state leave it only by death (see discussion at end of this section). To check the sensitivity of our results to assumption 1, we excluded foreign-born individuals from our sample, and results were not substantially altered. However, assumption 3 is demonstrably untenable (A2). Accordingly, our estimates of diabetes incidence adjust for the higher mortality of those with diabetes.

We develop the estimation formula first by referring to the population at exact ages and then substituting equivalent formulas for the population at discrete age intervals. Under our assumptions, the diabetes-free population is subject to two sources of decrement, incident diabetes and death (A3).

$$(A2.1) \quad {}_5p_x^O = \exp[-5(\mu_x^O + \delta_x^O)], \text{ where}$$

${}_5p_x^O$  = probability of surviving in the disease-free state from age  $x$  to age  $x+5$  for a person free of diabetes at age  $x$

$\mu_x^O$  = death rate at age  $x$  for a person free of diabetes

$\delta_x^O$  = rate of acquiring diabetes (incidence rate) at age  $x$  for a person free of diabetes.

$$(A2.2) \quad {}_5p_x = \exp[-5\mu_x], \text{ where}$$

${}_5p_x$  = probability of surviving from age  $x$  to age  $x+5$  for a randomly-chosen member of the population

$\mu_x$  = death rate at age  $x$  for a randomly-chosen member of the population.

Equations A2.1 and A2.2 assume that death rates and the incidence rate of diabetes are constant in the age interval  $x$  to  $x+5$ .

Call the non-diabetes population at age  $x$   $N_x^O$  and the total population at age  $x$   $N_x$ . Then the prevalence of non-diabetes at age  $x$  is

$$\Pi_x = \frac{N_x^O}{N_x}$$

The prevalence of non-diabetes in the same cohort at age x+5 is

$$\begin{aligned} \Pi_{x+5} &= \frac{N_{x+5}^O}{N_{x+5}} = \frac{N_x^O \exp[-5(\mu_x^O + \delta_x^O)]}{N_x \exp[-5\mu_x]} \\ (A2.3) \quad &= \Pi_x \exp[-5\delta_x^O] \exp[-5(\mu_x^O - \mu_x)]. \end{aligned}$$

Rewriting equation A2.3 gives

$$\begin{aligned} \exp[-5\delta_x^O] &= \frac{\Pi_{x+5} \exp[-5\mu_x]}{\Pi_x \exp[-5\delta_x^O]}, \text{ or} \\ (A2.4) \quad \delta_x^O &= -\frac{1}{5} \ln \left[ \frac{\Pi_{x+5}}{\Pi_x} \frac{{}_5p_x}{{}_5p_x^O} \right], \text{ where} \end{aligned}$$

${}_5p_x^O$  = probability of surviving the risk of death from x to x+5 for a diabetes-free person at age x.

Equation A2.4 shows that the incidence rate of diabetes between ages x and x+5 can be derived from the ratio of non-diabetes prevalence at x and x+5 and from differences in the survival probabilities between the entire population and the diabetes-free population over that age span. It also shows why a moving average of incidence estimates made using this equation is appropriate: errors in prevalence estimates at any particular age will appear in the numerator of one age-specific incidence estimate and in the denominator of the adjacent incidence estimate.

Substituting expressions for discrete five-year intervals into the equivalent terms in A2.4 gives

$$(A2.5) \quad {}_{10}\bar{\delta}_x^O = -\frac{1}{5} \ln \left[ \frac{{}_5\Pi_{x+5}}{{}_5\Pi_x} \frac{{}_5L_{x+5} / {}_5L_x}{{}_5L_{x+5}^O / {}_5L_x^O} \right], \text{ where}$$

${}_{10}\bar{\delta}_x^O$  = rate of developing diabetes for a non-diabetic person in the age interval x to x+10,

${}_5\Pi_x$  = prevalence of non-diabetes at ages x to x+5

${}_5L_x$  = person-years lived between ages x and x+5 in a life table for the population

${}_5L_x^O$  = person-years lived between ages x and x+5 in a life table for persons free of diabetes.

We interpret  ${}_{10}\bar{\delta}_x^O$  as pertaining to the age interval x+2.5 to x+7.5, i.e. the five-year age span at the middle of the ten-year age interval x to x+10. We use equation A2.5 for our incidence estimates in this study, assuming the incidence rate and differential mortality are constant within the five-year age intervals used. Values of  ${}_5\Pi_x$  are calculated from fitted values in the age-cohort

model of prevalence. Values of  ${}_{10}\bar{\delta}_x^O$  shown in Figure 4 come from fitted values of prevalence that use the coefficient for the cohort born in 1950-1959, but the shape of the graph in Figure 4 is robust to the use of other cohort coefficients. Values of  ${}_5L_x$  and  ${}_5L_x^{OM}$  come from the life tables as described in the Statistical Methods section.

Our calculations assume that there is no remission once the diabetes-defining threshold is reached. Remissions would offset new cases and produce an underestimate of the incidence rate. The principal source of remission of diabetes is bariatric surgery. According to the American Society for Metabolic and Bariatric Surgery (ASMBS), the number of procedures reached 103,000 in 2003 (A4). There were approximately 21,708,000 Americans aged 20+ with HbA1c values of 6.5% or greater in that year (A5,A6). Assuming that all those who had the surgery were diabetic, the annual rate of surgery among people with diabetes was .00497 in 2003. Two recent randomized clinical trials investigated the efficacy of bariatric surgery among those with diabetes. One found a one-year success rate in reducing HbA1c below 6.0% of 42% (A7) and the other a two-year rate of success of reducing HbA1c below 6.5% of 75% (A8). If we assume that the higher figure applies to the 5-year success rate required in our calculations, bariatric surgery would produce a remission rate of  $(.75)(.00497) = .00373$  among people with diabetes in 2003. Since the ratio of people without diabetes to people with diabetes in that year was 9.12 (A6), the rate of flow into the non-diabetic population as a result of successful bariatric surgery was  $.00373/9.12 = .00041$ . This value compares to an incidence rate above age 50 of about .010 in our calculations. So the incidence rate above age 50 would be perhaps higher by the factor 1.04 if allowance were taken of remission from bariatric surgery. There are other sources of remission, of course, but in these two randomized clinical trials the remission rates for very intensive non-surgical medical treatment was only 12% (A7) and 0% (A8). Due to the intensive nature of the medical treatment, these findings can be considered an upper bound on remission rates in the diabetic population at large. It is worth noting that projections of future diabetes prevalence assume the cure rate for diabetes is zero (A9), and clinical guidelines imply that people who have been diagnosed with diabetes are considered diabetic even if their blood glucose is under control (A10).

### Appendix 3: Prevalence Estimates and Confidence Intervals

Results displayed in Figures 1a and 1b are shown in more detail in **Appendix Tables 3a and 3b.**

**Appendix Table 3a: Age-Specific Prevalence Across Observation Periods**

| Period: | 1988-1994 |               | 1999-2002 |                | 2003-2006 |               | 2007-2010 |                |
|---------|-----------|---------------|-----------|----------------|-----------|---------------|-----------|----------------|
| Age     | Estimate  | 95% CI        | Estimate  | 95% CI         | Estimate  | 95% CI        | Estimate  | 95% CI         |
| 20-24   | 0.004397  | (0,0.009)     | 0.004269  | (-0.001,0.009) | 0.006232  | (0.002,0.011) | 0.005288  | (-0.002,0.012) |
| 25-29   | 0.004864  | (0.001,0.009) | 0.017177  | (0.007,0.027)  | 0.022937  | (0.01,0.035)  | 0.021857  | (0.011,0.033)  |
| 30-34   | 0.008792  | (0.004,0.014) | 0.026586  | (0.008,0.045)  | 0.024158  | (0.013,0.035) | 0.028596  | (0.018,0.039)  |
| 35-39   | 0.032287  | (0.015,0.05)  | 0.029327  | (0.016,0.043)  | 0.037264  | (0.022,0.052) | 0.039685  | (0.028,0.051)  |
| 40-44   | 0.045436  | (0.03,0.06)   | 0.046697  | (0.033,0.061)  | 0.047103  | (0.03,0.064)  | 0.052208  | (0.036,0.069)  |
| 45-49   | 0.050596  | (0.036,0.066) | 0.070413  | (0.045,0.096)  | 0.06769   | (0.048,0.087) | 0.085597  | (0.061,0.11)   |
| 50-54   | 0.091078  | (0.063,0.119) | 0.096351  | (0.073,0.12)   | 0.117324  | (0.095,0.14)  | 0.1389    | (0.113,0.165)  |
| 55-59   | 0.114349  | (0.091,0.138) | 0.114759  | (0.087,0.142)  | 0.152951  | (0.112,0.194) | 0.156262  | (0.12,0.192)   |
| 60-64   | 0.153817  | (0.129,0.178) | 0.178177  | (0.146,0.21)   | 0.165387  | (0.138,0.193) | 0.192598  | (0.151,0.234)  |
| 65-69   | 0.140782  | (0.109,0.172) | 0.193894  | (0.158,0.23)   | 0.200292  | (0.164,0.237) | 0.264501  | (0.204,0.325)  |
| 70-74   | 0.142179  | (0.112,0.173) | 0.160267  | (0.126,0.194)  | 0.211401  | (0.175,0.247) | 0.248475  | (0.218,0.278)  |
| 75-79   | 0.186321  | (0.148,0.224) | 0.160083  | (0.113,0.207)  | 0.183436  | (0.145,0.222) | 0.230738  | (0.182,0.279)  |

**Appendix Table 3b: Age-Specific Prevalence Across Birth Cohorts**

| Cohort:    | 1910-1919 |               | 1920-1929 |               | 1930-1939 |                 | 1940-1949 |                |
|------------|-----------|---------------|-----------|---------------|-----------|-----------------|-----------|----------------|
| <u>Age</u> | Estimate  | 95% CI        | Estimate  | 95% CI        | Estimate  | 95% CI          | Estimate  | 95% CI         |
| 20-24      |           |               |           |               |           |                 |           |                |
| 25-29      |           |               |           |               |           |                 |           |                |
| 30-34      |           |               |           |               |           |                 |           |                |
| 35-39      |           |               |           |               |           |                 |           |                |
| 40-44      |           |               |           |               |           |                 | 0.0613    | (0.031,0.091)  |
| 45-49      |           |               |           |               |           |                 | 0.0506    | (0.036,0.066)  |
| 50-54      |           |               |           |               | 0.0743    | (0.048,0.1)     | 0.1043    | (0.075,0.134)  |
| 55-59      |           |               |           |               | 0.1143    | (0.091,0.138)   | 0.1460    | (0.119,0.173)  |
| 60-64      |           |               | 0.1596    | (0.128,0.191) | 0.1626    | (0.131,0.194)   | 0.1814    | (0.158,0.205)  |
| 65-69      |           |               | 0.1408    | (0.109,0.172) | 0.2059    | (0.178,0.234)   | 0.2430    | (0.191,0.295)  |
| 70-74      | 0.1337    | (0.098,0.17)  | 0.1506    | (0.119,0.182) | 0.2190    | (0.198,0.24)    | 0.2620    | (0.13,0.394)   |
| 75-79      | 0.1863    | (0.148,0.224) | 0.1724    | (0.14,0.204)  | 0.2246    | (0.179,0.27)    |           |                |
|            |           |               |           |               |           |                 |           |                |
| Cohort:    | 1950-1959 |               | 1960-1969 |               | 1970-1979 |                 | 1980-1989 |                |
| <u>Age</u> | Estimate  | 95% CI        | Estimate  | 95% CI        | Estimate  | 95% CI          | Estimate  | 95% CI         |
| 20-24      |           |               | 0.0079    | (0,0.016)     | 0.0022    | (-,0.001,0.006) | 0.0058    | (0.002,0.009)  |
| 25-29      |           |               | 0.0049    | (0.001,0.009) | 0.0211    | (0.013,0.03)    | 0.0201    | (0.009,0.031)  |
| 30-34      | 0.0051    | (0.001,0.009) | 0.0203    | (0.01,0.031)  | 0.0257    | (0.017,0.034)   | 0.0364    | (-0.009,0.081) |
| 35-39      | 0.0323    | (0.015,0.05)  | 0.0324    | (0.023,0.042) | 0.0403    | (0.029,0.052)   |           |                |
| 40-44      | 0.0364    | (0.023,0.05)  | 0.0507    | (0.04,0.061)  | 0.0497    | (0.007,0.092)   |           |                |
| 45-49      | 0.0733    | (0.056,0.09)  | 0.0770    | (0.057,0.097) |           |                 |           |                |
| 50-54      | 0.1229    | (0.106,0.14)  | 0.1054    | (0.045,0.166) |           |                 |           |                |
| 55-59      | 0.1406    | (0.109,0.172) |           |               |           |                 |           |                |
| 60-64      | 0.1721    | (0.105,0.24)  |           |               |           |                 |           |                |
| 65-69      |           |               |           |               |           |                 |           |                |
| 70-74      |           |               |           |               |           |                 |           |                |
| 75-79      |           |               |           |               |           |                 |           |                |

## Appendix 4: Results of Models of Prevalence of Diabetes

Results displayed in Figures 2 and 3 are shown in more detail in Appendix Tables 4a, 4b, and 4c.

**Appendix Table 4a: Results of Age-Cohort Model**

Dependent Variable = Log Diabetes Prevalence

| Indicator      | Coefficient | SE       | t-statistic | p-value  | 95% CI   |          |
|----------------|-------------|----------|-------------|----------|----------|----------|
| Age 25-29      | 1.080695    | 0.292925 | 3.689325    | 0.001283 | 0.473206 | 1.688185 |
| Age 30-34      | 1.704125    | 0.314012 | 5.426944    | 1.89E-05 | 1.052904 | 2.355346 |
| Age 35-39      | 2.532282    | 0.328767 | 7.702351    | 1.1E-07  | 1.85046  | 3.214103 |
| Age 40-44      | 2.96014     | 0.342128 | 8.652146    | 1.57E-08 | 2.25061  | 3.669669 |
| Age 45-49      | 3.384705    | 0.367831 | 9.201791    | 5.36E-09 | 2.62187  | 4.14754  |
| Age 50-54      | 3.988511    | 0.395827 | 10.0764     | 1.05E-09 | 3.167616 | 4.809406 |
| Age 55-59      | 4.232604    | 0.430616 | 9.829178    | 1.65E-09 | 3.33956  | 5.125647 |
| Age 60-64      | 4.553761    | 0.435592 | 10.45419    | 5.35E-10 | 3.650399 | 5.457124 |
| Age 65-69      | 4.748697    | 0.46782  | 10.15069    | 9.19E-10 | 3.778497 | 5.718897 |
| Age 70-74      | 4.791991    | 0.494981 | 9.68117     | 2.17E-09 | 3.765464 | 5.818518 |
| Age 75-79      | 4.92001     | 0.536914 | 9.163504    | 5.77E-09 | 3.806519 | 6.0335   |
| 1920-29 cohort | 0.0491136   | 0.446574 | 0.109979    | 0.913423 | -0.87702 | 0.975251 |
| 1930-39 cohort | 0.3153463   | 0.443356 | 0.711272    | 0.48439  | -0.60412 | 1.234809 |
| 1940-49 cohort | 0.4939475   | 0.492615 | 1.002704    | 0.326905 | -0.52767 | 1.515569 |
| 1950-59 cohort | 0.5045705   | 0.527574 | 0.956399    | 0.349263 | -0.58955 | 1.598691 |
| 1960-69 cohort | 0.809644    | 0.554556 | 1.459987    | 0.158427 | -0.34043 | 1.959722 |
| 1970-79 cohort | 1.161477    | 0.583122 | 1.991825    | 0.058947 | -0.04784 | 2.370798 |
| 1980-89 cohort | 1.588968    | 0.630111 | 2.521726    | 0.019422 | 0.282197 | 2.895739 |
| constant       | -6.687672   | 0.60934  | -10.9753    | 2.16E-10 | -7.95137 | -5.42398 |
| R-Squared      | 0.9486      |          |             |          |          |          |
| N              | 41          |          |             |          |          |          |

Age/Cohort Model:  $\ln(Y_{ia}) = \alpha + \beta_a X_a + \beta_i X_i$ , where  $Y_{ia}$  = the proportion of the population in cohort  $i$  at age  $a$  with diabetes,  $X_a$  is a dummy variable indicating that the observation pertains to age  $a$ , and  $X_i$  is a dummy variable indicating that the observation pertains to cohort  $i$ .

**Appendix Table 4b: Results of Age-Period Model**

Dependent Variable: Log Diabetes Prevalence

| Indicator   | Coefficient | SE       | t-statistic | p-value  | 95% CI   |          |
|-------------|-------------|----------|-------------|----------|----------|----------|
| Age 25-29   | 0.8340861   | 0.177858 | 4.689627    | 4.59E-05 | 0.472232 | 1.19594  |
| Age 30-34   | 1.229262    | 0.176308 | 6.972242    | 5.69E-08 | 0.87056  | 1.587963 |
| Age 35-39   | 1.935714    | 0.176051 | 10.99518    | 1.43E-12 | 1.577535 | 2.293892 |
| Age 40-44   | 2.256934    | 0.173813 | 12.98482    | 1.61E-14 | 1.903309 | 2.61056  |
| Age 45-49   | 2.564451    | 0.181592 | 14.12202    | 1.52E-15 | 2.194998 | 2.933903 |
| Age 50-54   | 3.056156    | 0.183954 | 16.61367    | 1.36E-17 | 2.681898 | 3.430414 |
| Age 55-59   | 3.259276    | 0.195733 | 16.65169    | 1.27E-17 | 2.861055 | 3.657497 |
| Age 60-64   | 3.512932    | 0.177514 | 19.78963    | 7.07E-20 | 3.151777 | 3.874086 |
| Age 65-69   | 3.625526    | 0.187088 | 19.37873    | 1.34E-19 | 3.244892 | 4.006159 |
| Age 70-74   | 3.586429    | 0.189392 | 18.93653    | 2.7E-19  | 3.201108 | 3.97175  |
| Age 75-79   | 3.620085    | 0.210792 | 17.17377    | 5.08E-18 | 3.191226 | 4.048944 |
| 2001 NHANES | 0.2922673   | 0.108457 | 2.694766    | 0.010993 | 0.071609 | 0.512926 |
| 2005 NHANES | 0.4265295   | 0.108519 | 3.930467    | 0.00041  | 0.205746 | 0.647313 |
| 2009 NHANES | 0.5343021   | 0.100049 | 5.34043     | 6.76E-06 | 0.330752 | 0.737852 |
| constant    | -5.571567   | 0.133038 | -41.8794    | 3.46E-30 | -5.84224 | -5.3009  |
| R-Squared   | 0.9686      |          |             |          |          |          |
| N           | 48          |          |             |          |          |          |

Age/Period model:  $\ln(Y_{ia}) = \alpha + \beta_a X_a + \beta_p X_p$ , where  $Y_{ia}$  = the proportion of the population in cohort  $i$  at age  $a$  with diabetes,  $X_a$  is a dummy variable indicating that the observation pertains to age  $a$ , and  $X_p$  is a dummy variable indicating that the observation pertains to period  $p$ .



**Appendix Table 4c: Results of Age-Period-Cohort Obesity Model**

Dependent Variable: Log Diabetes Prevalence

| Indicator   | Coefficient | SE       | t-statistic | p-value  | 95% CI   |          |
|-------------|-------------|----------|-------------|----------|----------|----------|
| Age 25-29   | 0.9926029   | 0.155681 | 6.375895    | 5.71E-07 | 0.6742   | 1.311005 |
| Age 30-34   | 1.655445    | 0.18084  | 9.154213    | 4.71E-10 | 1.285587 | 2.025304 |
| Age 35-39   | 2.672352    | 0.22659  | 11.79378    | 1.38E-12 | 2.208924 | 3.13578  |
| Age 40-44   | 3.191595    | 0.25972  | 12.28859    | 5.08E-13 | 2.660407 | 3.722782 |
| Age 45-49   | 3.636119    | 0.288422 | 12.60695    | 2.71E-13 | 3.046231 | 4.226008 |
| Age 50-54   | 4.259973    | 0.314103 | 13.56235    | 4.38E-14 | 3.61756  | 4.902385 |
| Age 55-59   | 4.545092    | 0.333427 | 13.63146    | 3.86E-14 | 3.863158 | 5.227026 |
| Age 60-64   | 4.892977    | 0.345447 | 14.16418    | 1.46E-14 | 4.186459 | 5.599496 |
| Age 65-69   | 5.07219     | 0.360942 | 14.05265    | 1.79E-14 | 4.333981 | 5.810399 |
| Age 70-74   | 5.107939    | 0.392845 | 13.00242    | 1.26E-13 | 4.304481 | 5.911398 |
| Age 75-79   | 5.116603    | 0.416248 | 12.2922     | 5.04E-13 | 4.26528  | 5.967926 |
| 2001 NHANES | -0.0517601  | 0.119307 | -0.43384    | 0.667616 | -0.29577 | 0.192251 |
| 2005 NHANES | 0.0782829   | 0.119932 | 0.652728    | 0.519073 | -0.16701 | 0.323571 |
| 2009 NHANES | 0.0561693   | 0.142336 | 0.394624    | 0.696008 | -0.23494 | 0.347279 |
| obesity     | 13.10013    | 2.828275 | 4.631844    | 7.05E-05 | 7.315658 | 18.8846  |
| constant    | -7.107672   | 0.35859  | -19.8212    | 2.09E-18 | -7.84107 | -6.37427 |
| R-Squared   | 0.9813      |          |             |          |          |          |
| N           | 45          |          |             |          |          |          |

Age/Period/Cohort model:  $\ln(Y_{ia}) = \alpha + \beta_a X_a + \beta_p X_p + \gamma Coh\_ob$ , where  $Y_{ia}$ ,  $X_a$ , and  $X_p$  are defined as in the Age/Period model and  $Coh\_ob$  is a continuous variable representing the prevalence of obesity at age 25 in the cohort corresponding to the given age and period.

## Appendix 5: Model Age Pattern of Diabetes Incidence

The model age pattern of diabetes incidence shown in Figure 4 is shown in detail in the following table:

**Appendix Table 5: Estimates of Annual Incidence (New Cases Per Person-Year without Diabetes) for 1950-59 birth cohort**

| Age Interval   | Incidence | Incidence with no differential mortality |
|----------------|-----------|------------------------------------------|
| 20-24 to 25-29 | 0.000994  | 0.000934                                 |
| 25-29 to 30-34 | 0.001693  | 0.001617                                 |
| 30-34 to 35-39 | 0.002422  | 0.002303                                 |
| 35-39 to 40-44 | 0.003611  | 0.003429                                 |
| 40-44 to 45-49 | 0.006399  | 0.00612                                  |
| 45-49 to 50-54 | 0.007944  | 0.007516                                 |
| 50-54 to 55-59 | 0.011015  | 0.010359                                 |
| 55-59 to 60-64 | 0.011268  | 0.010269                                 |
| 60-64 to 65-69 | 0.010361  | 0.008846                                 |
| 65-69 to 70-74 | 0.009888  | 0.007609                                 |
| 70-74 to 75-79 | 0.008723  | 0.006022                                 |

Incidence estimates are based on cohort prevalence estimates from age-cohort model and life-table values by diabetes status (nondiabetic versus entire population); see Methods section in text and Appendix 2 for details. Figure 4 plots the values in the “Incidence” column above. To demonstrate the effect of using mortality differences by diabetes status on the estimates, we present the estimates of incidence that would result if we had ignored mortality differences by diabetes status.

## Appendix 6: Results based on “High Risk” of Diabetes, and Discussion of Threshold Choice

Appendix Figures 6a and 6b show estimates of the prevalence of “at least high risk” of diabetes, using  $\text{HbA1c} \geq 6.0\%$  (42 mmol/mol) (A11), by period and cohort. Appendix Figure 6c shows the cohort coefficients from the age/cohort model. Appendix Figure 6d shows the period effects in the age/period and age/period/cohort models discussed in the Statistical Methods section, as applied to the threshold  $\text{HbA1c} \geq 6.0\%$ . Appendix Figure 6e shows the modeled age-pattern of “at least high risk.”

Although the recent ADA guidelines mention 6.0% as a possible threshold, they note that there is a “continuum of risk for diabetes with all glycemic measures” and did not formally identify 6.0% as a formal “high risk” threshold (A11). A recent meta-analysis indicated that there is no clear HbA1c-based threshold above which the risk of incident diabetes increases dramatically (A12). Nevertheless, using the 6.0% threshold is a useful way to test the sensitivity of our methods to the choice of threshold. The patterns we find using the 6.0% threshold are similar to the patterns we find using the 6.5% threshold.

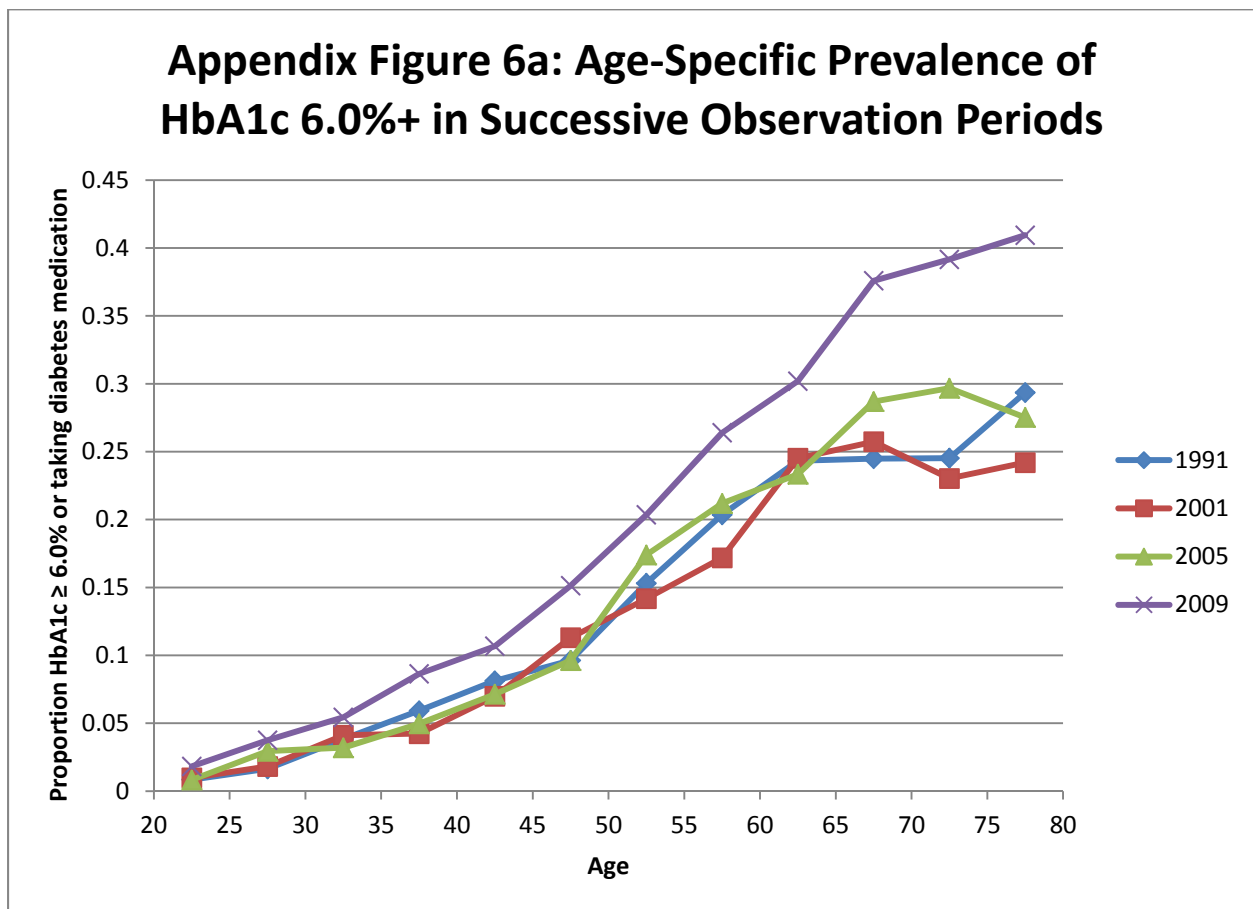

**Appendix Figure 6b: Age-Specific Prevalence of HbA1c 6.0%+ in Successive 10-year Cohorts**

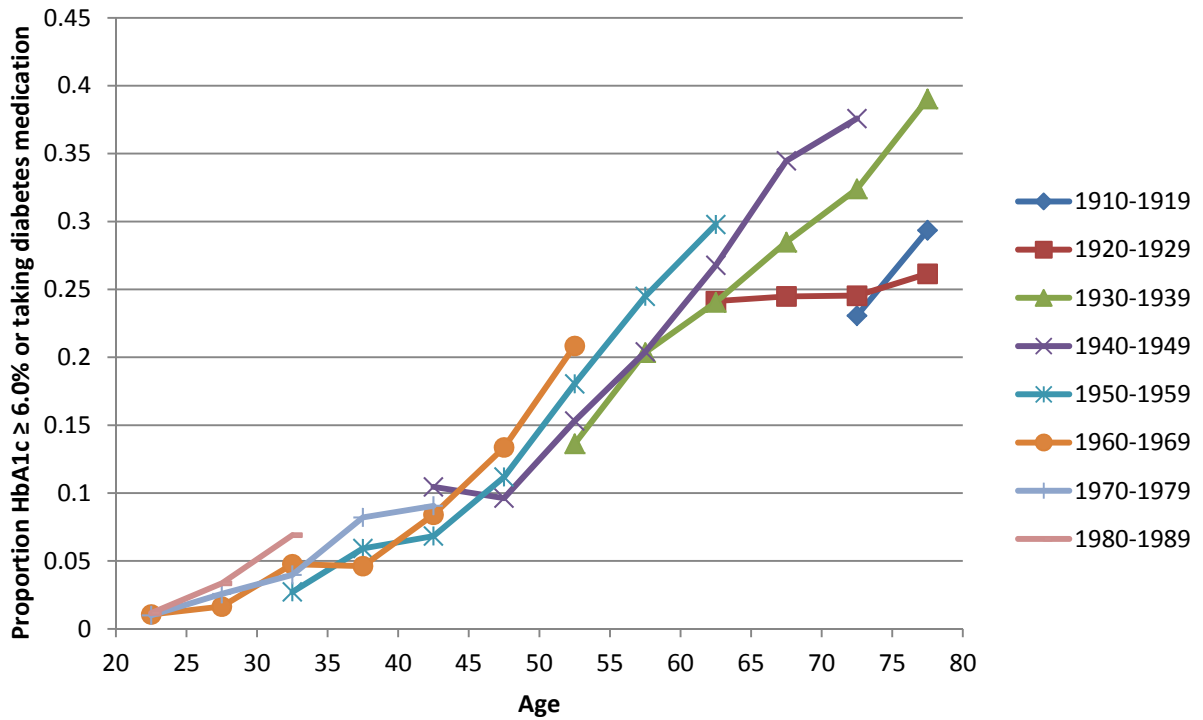

**Appendix Figure 6c: Age-Adjusted Prevalence of HbA1c  $\geq$  6.0% in Birth Cohorts Relative to 1910-1919 Birth Cohort**

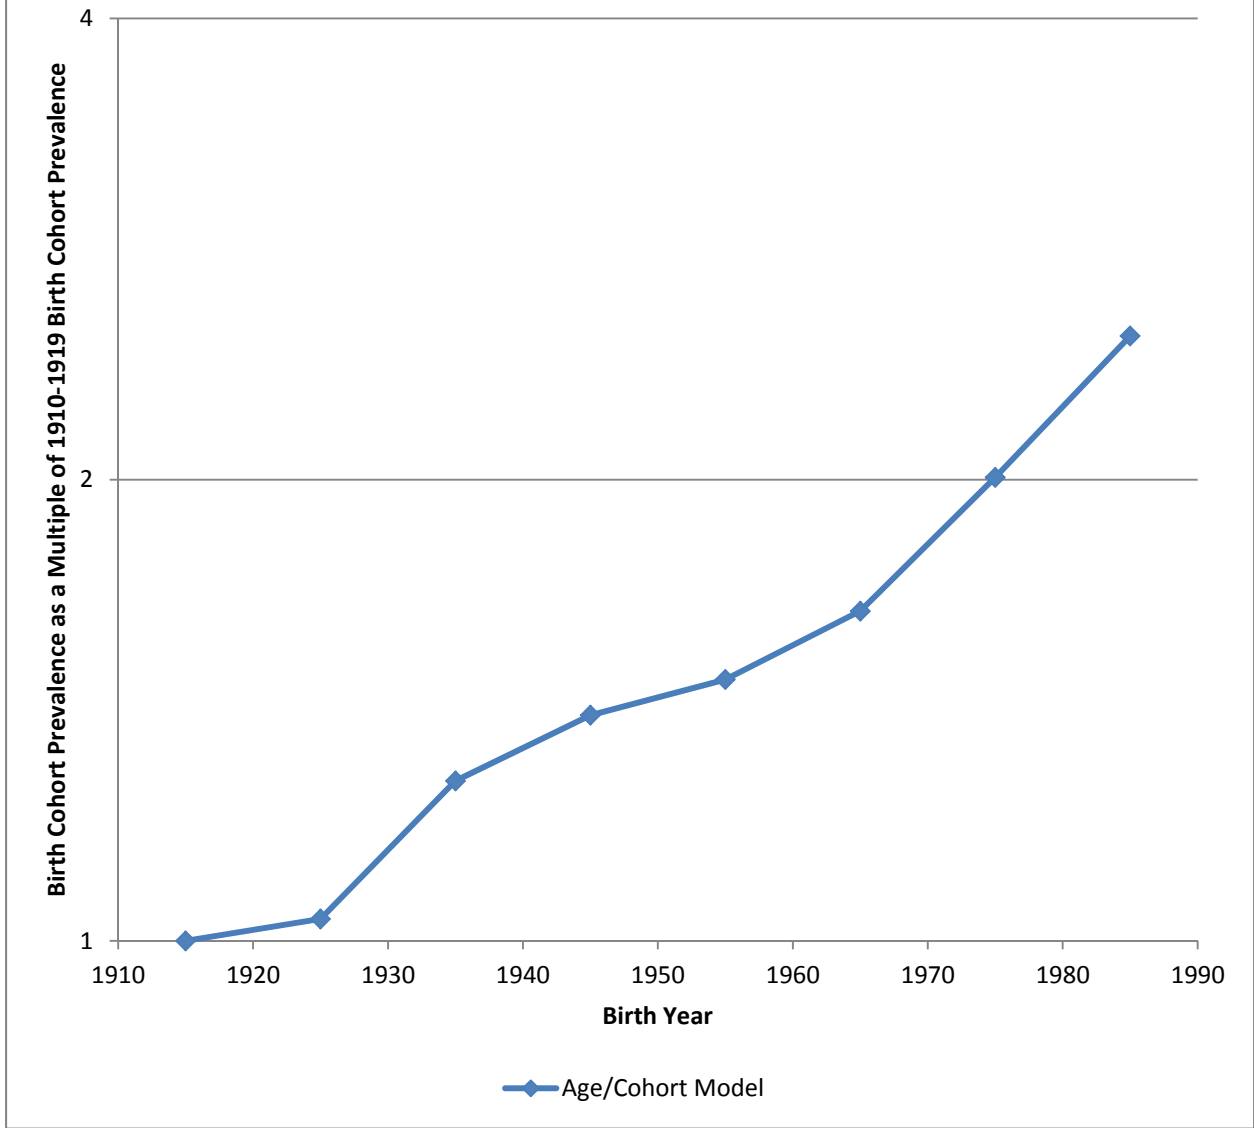

**Appendix Figure 6d: Age-Adjusted Prevalence of HbA1c  $\geq$  6.0% Relative to 1988-1994**

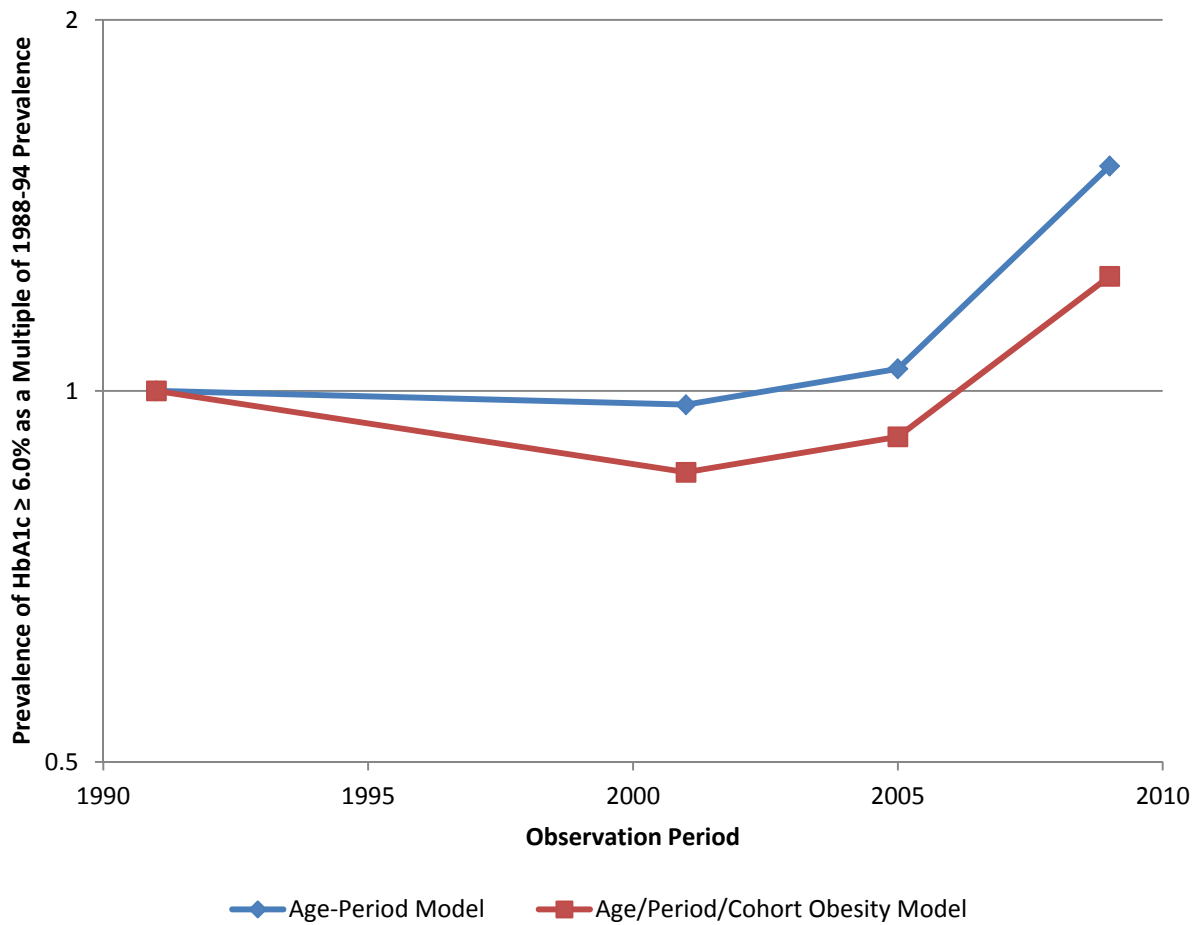

**Appendix Figure 6e: Age-Specific Prevalence of HbA1c  $\geq$  6.0% Relative to Age 20-24 Prevalence**

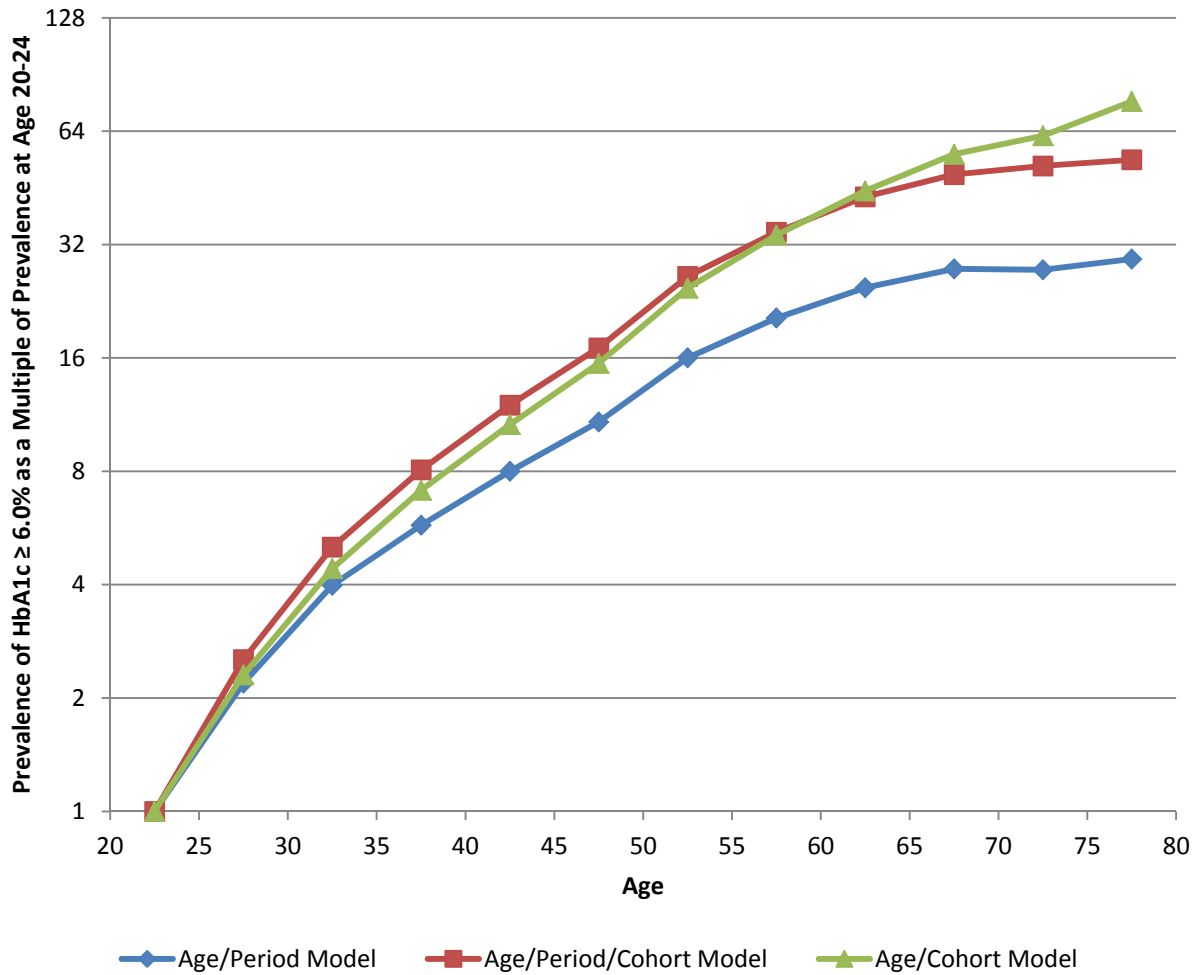

**Appendix Table 6a: Results of Age-Cohort Model**Dependent variable = Log Prevalence of (HbA1c  $\geq$  6.0%)

| Indicator      | Coefficient | SE       | t-statistic | p-value  | 95% CI   |          |
|----------------|-------------|----------|-------------|----------|----------|----------|
| Age 25-29      | 0.8303195   | 0.121278 | 6.846402    | 7.07E-07 | 0.578804 | 1.081835 |
| Age 30-34      | 1.474147    | 0.130009 | 11.33883    | 1.17E-10 | 1.204525 | 1.743768 |
| Age 35-39      | 1.944194    | 0.136118 | 14.28316    | 1.31E-12 | 1.661903 | 2.226485 |
| Age 40-44      | 2.33351     | 0.141649 | 16.47384    | 7.35E-14 | 2.039747 | 2.627273 |
| Age 45-49      | 2.691181    | 0.152291 | 17.67128    | 1.74E-14 | 2.375348 | 3.007013 |
| Age 50-54      | 3.129008    | 0.163882 | 19.09303    | 3.51E-15 | 2.789137 | 3.468879 |
| Age 55-59      | 3.4235      | 0.178286 | 19.20231    | 3.11E-15 | 3.053757 | 3.793242 |
| Age 60-64      | 3.654953    | 0.180346 | 20.26636    | 1.01E-15 | 3.280939 | 4.028967 |
| Age 65-69      | 3.828174    | 0.193689 | 19.76451    | 1.71E-15 | 3.426487 | 4.229861 |
| Age 70-74      | 3.876574    | 0.204934 | 18.91618    | 4.26E-15 | 3.451566 | 4.301582 |
| Age 75-79      | 4.00686     | 0.222296 | 18.02492    | 1.16E-14 | 3.545847 | 4.467873 |
| 1920-29 cohort | 0.0330163   | 0.184893 | 0.17857     | 0.85991  | -0.35043 | 0.41646  |
| 1930-39 cohort | 0.240484    | 0.18356  | 1.31011     | 0.203674 | -0.1402  | 0.621165 |
| 1940-49 cohort | 0.3391446   | 0.203955 | 1.66284     | 0.110527 | -0.08383 | 0.762121 |
| 1950-59 cohort | 0.3927891   | 0.218429 | 1.79825     | 0.085875 | -0.0602  | 0.845782 |
| 1960-69 cohort | 0.4955284   | 0.2296   | 2.158226    | 0.042089 | 0.019368 | 0.971689 |
| 1970-79 cohort | 0.6965528   | 0.241427 | 2.885149    | 0.008593 | 0.195864 | 1.197242 |
| 1980-89 cohort | 0.9089721   | 0.260882 | 3.48423     | 0.002102 | 0.367937 | 1.450008 |
| constant       | -5.280235   | 0.252282 | -20.9299    | 5.14E-16 | -5.80344 | -4.75703 |
| R-Squared      | 0.9878688   |          |             |          |          |          |
| N              | 41          |          |             |          |          |          |



**Appendix Table 6b: Results of Age-Period Model**

Dependent variable = Log Prevalence of (HbA1c ≥ 6.0%)

| Indicator   | Coefficient | SE       | t-statistic | p-value  |          |          |
|-------------|-------------|----------|-------------|----------|----------|----------|
| Age 25-29   | 0.785042    | 0.089818 | 8.740355    | 4.21E-10 | 0.602306 | 0.967778 |
| Age 30-34   | 1.382502    | 0.089036 | 15.52754    | 9.9E-17  | 1.201358 | 1.563646 |
| Age 35-39   | 1.750047    | 0.088906 | 19.68429    | 8.32E-20 | 1.569167 | 1.930927 |
| Age 40-44   | 2.079389    | 0.087776 | 23.6898     | 2.73E-22 | 1.900808 | 2.25797  |
| Age 45-49   | 2.381469    | 0.091704 | 25.96907    | 1.53E-23 | 2.194896 | 2.568043 |
| Age 50-54   | 2.77329     | 0.092897 | 29.85342    | 1.85E-25 | 2.58429  | 2.962291 |
| Age 55-59   | 3.016927    | 0.098845 | 30.52183    | 9.13E-26 | 2.815825 | 3.218028 |
| Age 60-64   | 3.201748    | 0.089644 | 35.71608    | 5.92E-28 | 3.019365 | 3.384131 |
| Age 65-69   | 3.317046    | 0.094479 | 35.10868    | 1.03E-27 | 3.124826 | 3.509265 |
| Age 70-74   | 3.311332    | 0.095643 | 34.6218     | 1.61E-27 | 3.116745 | 3.505919 |
| Age 75-79   | 3.376998    | 0.10645  | 31.7239     | 2.66E-26 | 3.160425 | 3.593572 |
| 2001 NHANES | -0.0258708  | 0.054771 | -0.47235    | 0.639789 | -0.1373  | 0.085562 |
| 2005 NHANES | 0.0411817   | 0.054802 | 0.751463    | 0.4577   | -0.07031 | 0.152677 |
| 2009 NHANES | 0.4200199   | 0.050525 | 8.313196    | 1.33E-09 | 0.317227 | 0.522813 |
| constant    | -4.683064   | 0.067184 | -69.7048    | 2.09E-37 | -4.81975 | -4.54638 |
| R-Squared   | 0.9897704   |          |             |          |          |          |
| N           | 48          |          |             |          |          |          |

**Appendix Table 6c: Results of Age-Period-Cohort Obesity Model**

Dependent variable = Log Prevalence of (HbA1c ≥ 6.0%)

| Indicator   | Coefficient | SE       | t-statistic | p-value  | 95% CI   |          |
|-------------|-------------|----------|-------------|----------|----------|----------|
| Age 25-29   | 0.9286565   | 0.087923 | 10.5622     | 1.88E-11 | 0.748835 | 1.108479 |
| Age 30-34   | 1.61597     | 0.102132 | 15.82242    | 8.41E-16 | 1.407087 | 1.824853 |
| Age 35-39   | 2.088447    | 0.12797  | 16.31986    | 3.74E-16 | 1.82672  | 2.350175 |
| Age 40-44   | 2.484058    | 0.146681 | 16.93516    | 1.41E-16 | 2.184062 | 2.784053 |
| Age 45-49   | 2.834346    | 0.16289  | 17.40037    | 6.89E-17 | 2.501198 | 3.167493 |
| Age 50-54   | 3.271163    | 0.177394 | 18.44012    | 1.46E-17 | 2.908352 | 3.633973 |
| Age 55-59   | 3.541548    | 0.188307 | 18.8073     | 8.63E-18 | 3.156417 | 3.92668  |
| Age 60-64   | 3.757913    | 0.195096 | 19.26188    | 4.54E-18 | 3.358897 | 4.156929 |
| Age 65-69   | 3.893697    | 0.203847 | 19.1011     | 5.69E-18 | 3.476784 | 4.31061  |
| Age 70-74   | 3.946568    | 0.221865 | 17.78819    | 3.83E-17 | 3.492804 | 4.400332 |
| Age 75-79   | 3.984019    | 0.235082 | 16.94739    | 1.39E-16 | 3.503223 | 4.464814 |
| 2001 NHANES | -0.1520016  | 0.06738  | -2.25588    | 0.031793 | -0.28981 | -0.01419 |
| 2005 NHANES | -0.0857865  | 0.067733 | -1.26654    | 0.2154   | -0.22432 | 0.052743 |
| 2009 NHANES | 0.2139795   | 0.080386 | 2.661893    | 0.012539 | 0.049571 | 0.378388 |
| obesity     | 4.388277    | 1.597306 | 2.747298    | 0.010222 | 1.121419 | 7.655136 |
| constant    | -5.274105   | 0.202519 | -26.0426    | 1.15E-21 | -5.6883  | -4.85991 |
| R-Squared   | 0.9925176   |          |             |          |          |          |
| N           | 45          |          |             |          |          |          |

## References

- A1. Perry GS, Byers TE, Mokdad AH, Serdula MK, Williamson DF. The Validity of Self-Reports of Past Body Weights by U.S. Adults. *Epidemiology*. 1995;6(1):61–66.
- A2. Stokes A, Mehta NK. Mortality and excess risk in US adults with pre-diabetes and diabetes: a comparison of two nationally representative cohorts, 1988-2006. *Popul Heal. Metr.* 2013;11(1):7.
- A3. Preston SH, Guillot M, Heuveline P. *Demography*. Oxford: Blackwell; 2001.
- A4. National Institute of Diabetes and Digestive and Kidney Diseases. Longitudinal Assessment of Bariatric Surgery (LABS).<http://win.niddk.nih.gov/publications/labs.htm>. Published 2011.
- A5. U.S. Census Bureau. Statistical Abstract of the United States, 2004-2005.<http://www.census.gov/prod/2004pubs/04statab/pop.pdf>. Published 2005.
- A6. Cheng YJ, Imperatore G, Geiss LS, et al. Secular changes in the age-specific prevalence of diabetes among U.S. adults: 1988-2010. *Diabetes Care*. 2013;36(9):2690–6.
- A7. Schauer PR, Kashyap SR, Wolski K, et al. Bariatric surgery versus intensive medical therapy in obese patients with diabetes. *N Engl J Med*. 2012;366(17):1567–1576.
- A8. Mingrone G, Panunzi S, De Gaetano A, et al. Bariatric surgery versus conventional medical therapy for type 2 diabetes. *N Engl J Med*. 2012;366(17):1577–1585.
- A9. Boyle JP, Thompson TJ, Gregg EW, Barker LE, Williamson DF. Projection of the year 2050 burden of diabetes in the US adult population: dynamic modeling of incidence, mortality, and prediabetes prevalence. *Popul Heal. Metr.* 2010;8:29.
- A10. Ali MK, Bullard KM, Saaddine JB, Cowie CC, Imperatore G, Gregg EW. Achievement of goals in U.S. diabetes care, 1999-2010. *N Engl J Med*. 2013;368(17):1613–1624.
- A11. American Diabetes Association. Diagnosis and classification of diabetes mellitus. *Diabetes Care*. 2012;35 Suppl 1:S64–71.
- A12. Gregg EW, Geiss L, Zhang P, Zhuo X, Williamson DF, Albright AL. Implications of risk stratification for diabetes prevention: the case of hemoglobin A1c. *Am J Prev Med*. 2013;44(4 Suppl 4):S375–80.
